# Supplementary material for: Mechanistic Insight into Control of CFTR by AMPK
Source: PubMed Central journal article supplement — J Biol Chem. 2009 Feb 27;284(9):5645–53. doi: 10.1074/jbc.M806780200 (PMC2645823; doi:10.1074/jbc.m806780200), 2009-02-27
Supplement: M806780200_1.pdf [file M806780200_1.pdf]

# Supplement 1

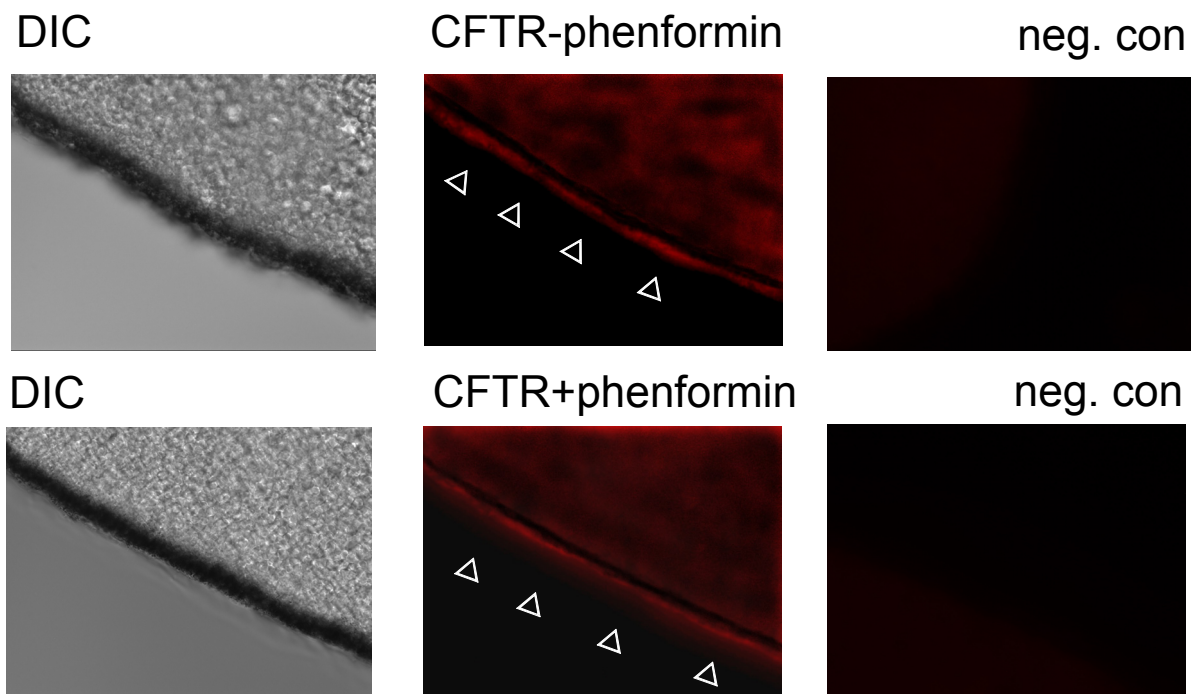

Expression of CFTR in the membrane of *Xenopus* oocytes (arrows) in the absence or presence (2 hours treatment) of phenformin (2 mM). Phenformin does not detectably alter membrane expression of CFTR.

## Supplementary Figure 2

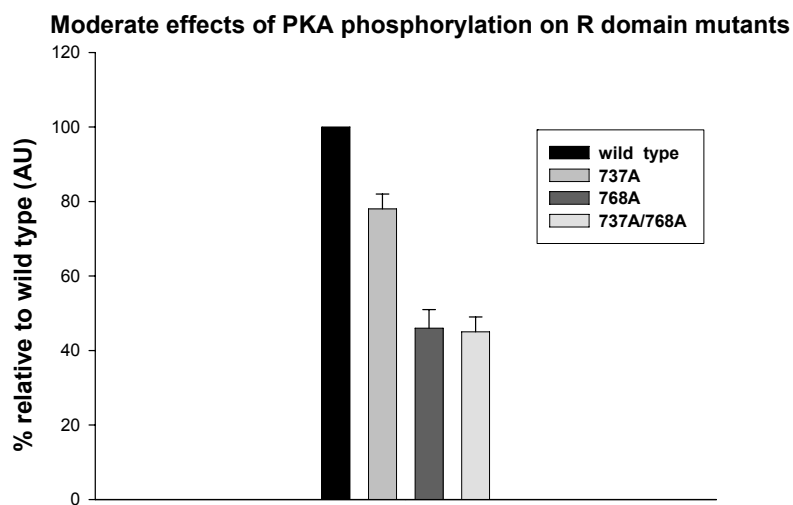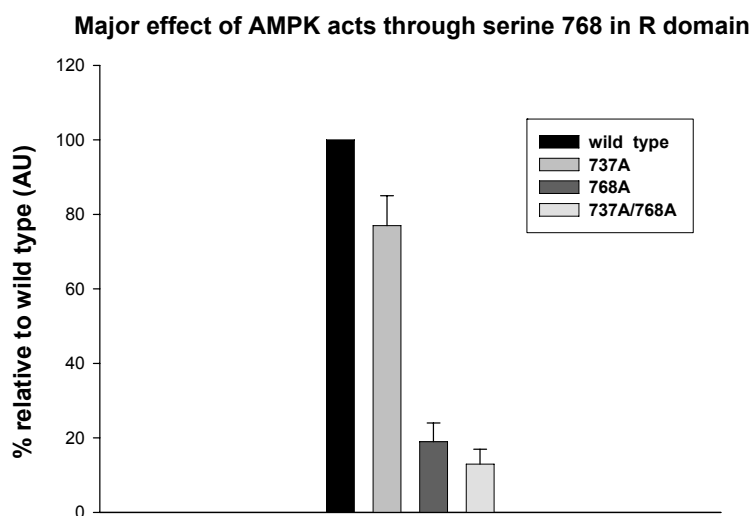

**Figure S2 Serine 768, PKA and AMPK.** Quantitation by densitometry (AU) of R domain phosphorylation after autoradiography with each mutant's incorporation of  $^{32}\text{PO}_4$  expressed relative to wild type (100%, black bar) in the presence of PKA (upper panel) AMPK (lower panel). With AMPK (but not with PKA) as phosphorylating kinase in vitro, the majority of the incorporation vanishes to near background levels after mutating serine 768 (third bar, lower panel) whereas serine 737 has only a modest effect with either kinase (second bar). The data are mean and range of values from three independent experiments. Values showing around 20% for AMPK phosphorylation for the mutants shown are very close to baseline and approach background values

(see Figure 2 for autoradiographs of peptide maps using long exposures that confirm this idea).
